# Supplementary material for: p-Cresyl glucuronide is a major metabolite of p-cresol in mouse: in contrast to p-cresyl sulphate, p-cresyl glucuronide fails to promote insulin resistance
Source: Oxford University Press journal article supplement (doi:10.1093/ndt/gfx089), 2017-04-10
Supplement: gfx089_supplementary_table_s2.pdf [file gfx089_supplementary_table_s2.pdf]

**Supplementary Table 2**  
**Effect of p-Cresol, PCS and PCG on C2C12 muscle cell viability**

| <b>Treatment</b>               | <b>Concentration<br/>mg/L</b> | <b>Cell viability<br/>% of control</b> |
|--------------------------------|-------------------------------|----------------------------------------|
| Control                        | 0                             | 100 ± 3                                |
| p-cresyl glucuronide<br>(p-CG) | 6                             | 101 ± 2                                |
|                                | 30                            | 102 ± 5                                |
|                                | 61                            | 96 ± 2                                 |
| p-cresyl-sulfate<br>(p-CS)     | 20                            | 97 ± 2                                 |
|                                | 40                            | 98 ± 2                                 |
|                                | 80                            | 92 ± 3                                 |
| p-Cresol                       | 20                            | 93 ± 5                                 |
|                                | 40                            | 93 ± 5                                 |
|                                | 80                            | 84 ± 8 *                               |
| p-CG + p-CS                    | 6 + 40                        | 92 ± 1 *                               |

*Cell viability was measured by MTT assay after 16 h of incubation with PCS, PCG or p-cresol at indicated concentrations. Data are expressed as mean ± SEM for n=3 independent experiments. \* indicates a significant difference from control at the P<0.05 level.*
